# Supplementary material for: CONSTANS-Like 9 (OsCOL9) Interacts with Receptor for Activated C-Kinase 1(OsRACK1) to Regulate Blast Resistance through Salicylic Acid and Ethylene Signaling Pathways
Source: PLOS journal article supplement (doi:10.1371/journal.pone.0166249), 2016-11-09
Supplement: S1 (10.1371/journal.pone.0166249.s001) [file journal.pone.0166249.s001]

A

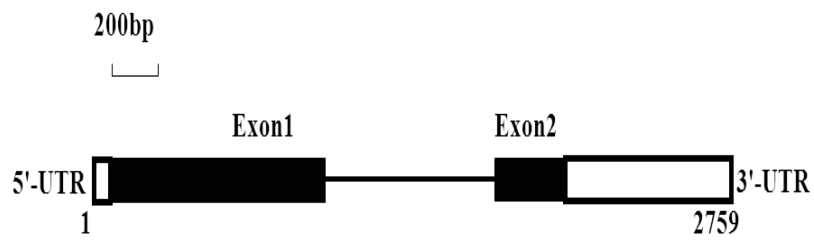

B

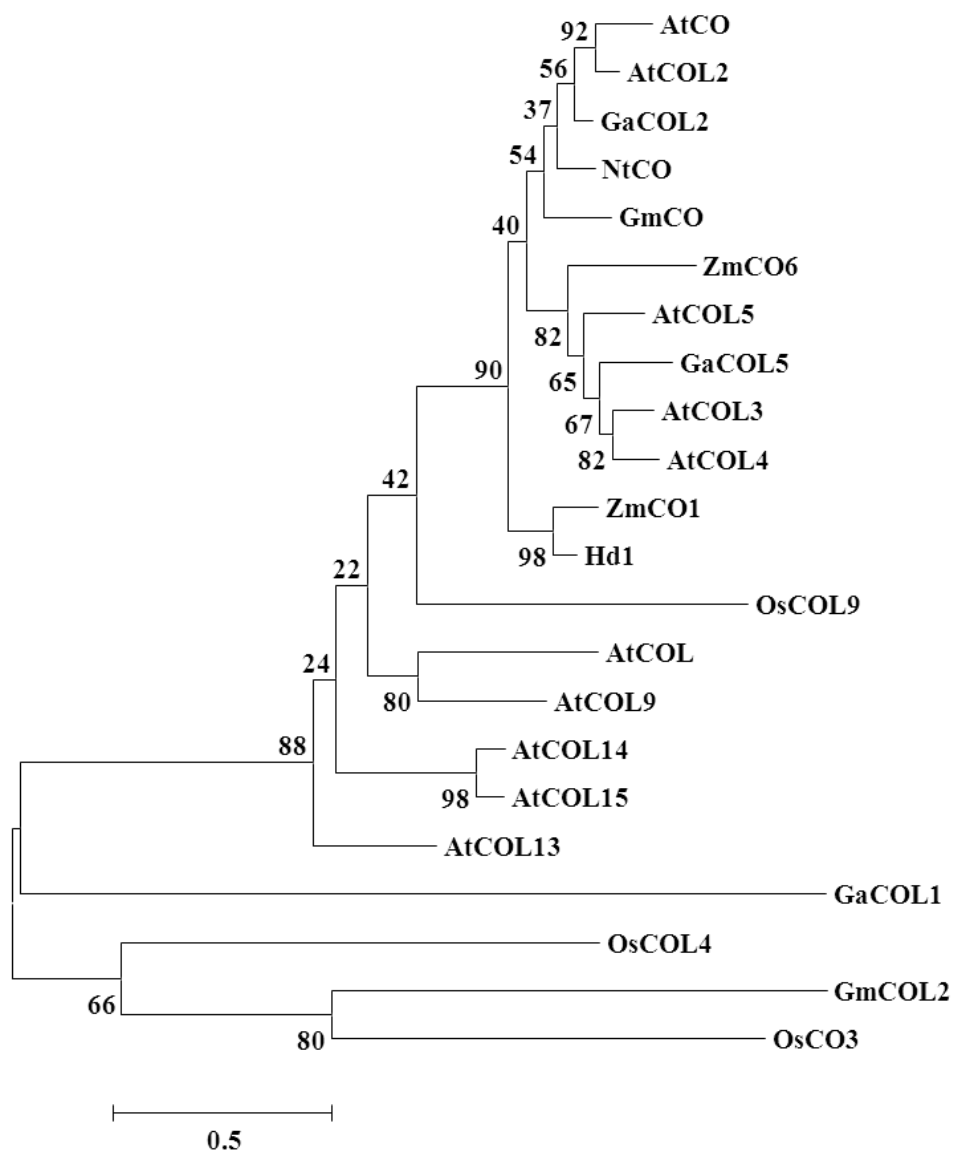

C

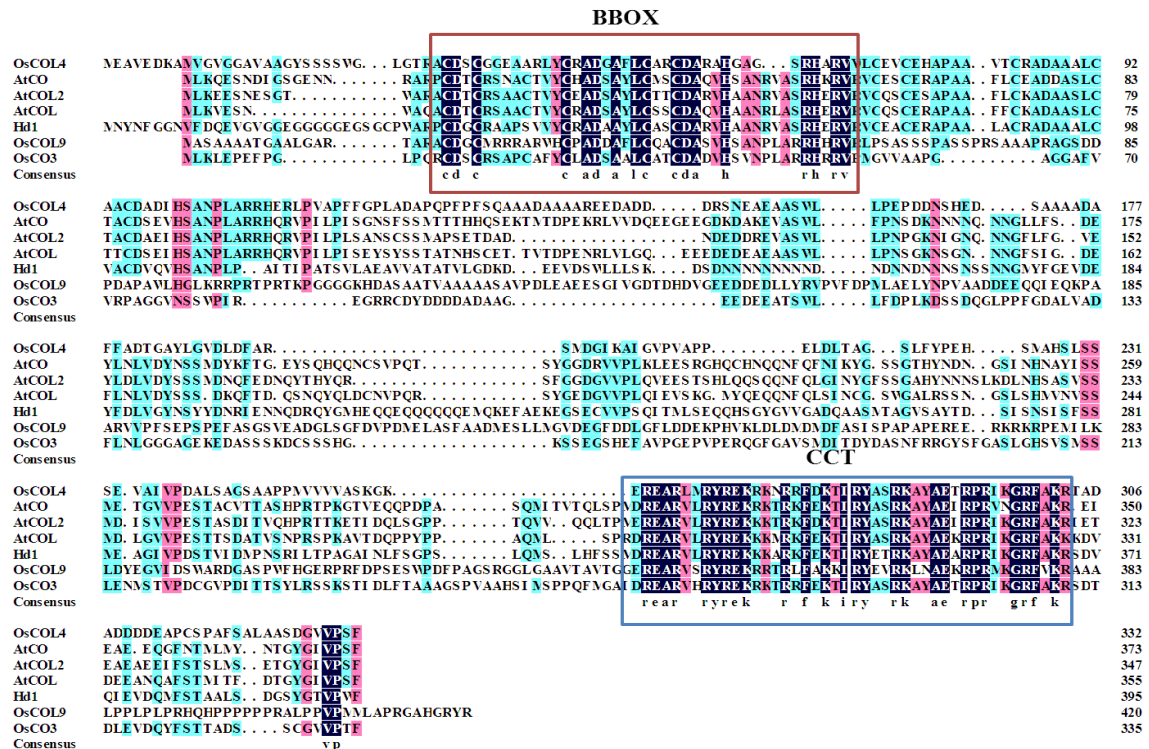

S1 Fig. Exon/intron structure of OsCOL9 and alignment and phylogenetic analysis of OsCOL9 with other COL amino acid sequences. (A) OsCOL9 has two exons (boxes) and one intron (line between the two boxes). Closed boxes indicate coding region, and open boxes show the 5' and 3' untranslated regions (UTR). (B) Phylogenetic relationships of OsCOL9 proteins and selected species with the MEGA6 program using the Neighbor-Joining method. The genes and accession numbers were AtCO (CAA64407), AtCOL2 (AAB67880), GaCOL2 (KHG24977), NtCO (AEJ84000), GmCO (ACJ65311), ZmCO6 (NP001148229), AtCOL5 (Q9FHH8), GaCOL5 (KHG29079), AtCOL3 (Q9SK53), AtCOL4 (Q940T9), ZmCO1 (NP001120722), Hd1(AB041837), OsCOL9 (LOC\_Os03g50310), AtCOL (CAB78567), AtCOL9 (AEE74583), AtCOL14 (O22800), AtCOL15 (Q9C78E), AtCOL3 (O822256), GaCOL1 (KHG24445), OsCOL4 (AK100097), GmCOL2 (NP001278944), OsCO3 (AB00187). (C) Amino acid sequence alignment of OsCOL9 and other COLs from rice and Arabidopsis. Their gene accession numbers have been showed in (B). The N-terminal conserved domain B-box was highlight marked by red rectangle. The C-terminal CCT domain was highlight marked by blue rectangle.
